# Supplementary material
Source: Springer Nature journal article supplement (https://www.springermedizin.de/resource/supplementary/13099_2013_97_MOESM1_ESM.pdf/9665536)
Supplement: MOESM1 [file 9665536]

**Table S1. List of primers used in this study**

| Gene                        | Primer         | Oligonucleotide sequence (5'-3') | Source         |
|-----------------------------|----------------|----------------------------------|----------------|
| <b>LAP</b><br>(Full length) | LAP Full F     | GACCATGG*ATGGCAATTAAAGAAAATG     | [Kim KP, 2004] |
|                             | LAP Full R     | GACTCGAGAACACCTTTGTAAGCTT        |                |
| <b>LAP</b>                  | LAP qRT-PCR F  | CCACAGCTTGGCACACAAAAA            | this study     |
|                             | LAP qRT-PCR R  | CGCACGACCCGTGAAGGAA              |                |
| <b>InlA</b>                 | InlA qRT-PCR F | TGGCGCTTTGATTGCACCTGCTA          | this study     |
|                             | InlA qRT-PCR R | AGTGGCTGCGTCACGGTTCCA            |                |
| <b>16S</b>                  | 16S F          | GGTGCATTAGCTAGTTGG               |                |
|                             | 16S R          | AATCCGGACAACGCTTGC               |                |

\**Nco*I restriction enzyme site
